# Supplementary material for: Porphyromonas gingivalis induces penetration of lipopolysaccharide and peptidoglycan through the gingival epithelium via degradation of junctional adhesion molecule 1
Source: PubMed Central journal article supplement (PMC6932823; doi:10.1371/journal.ppat.1008124), 2019-11-07

**Figure 1A**

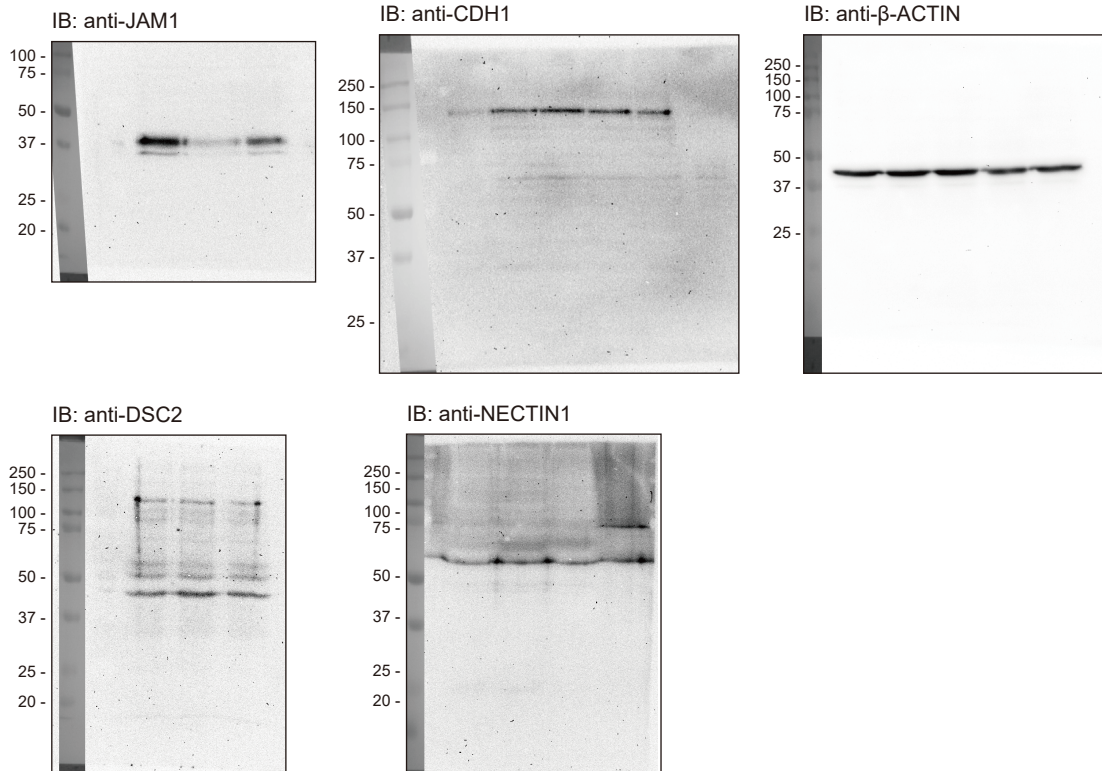

**Figure 1B**

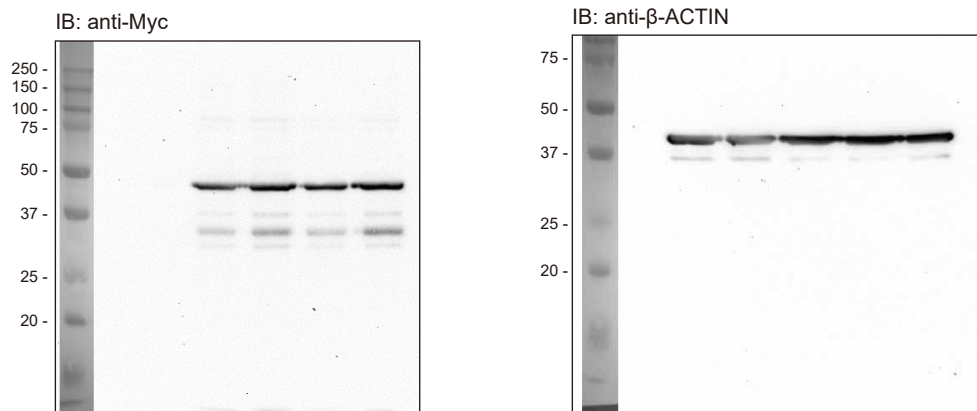

**Figure 1C**

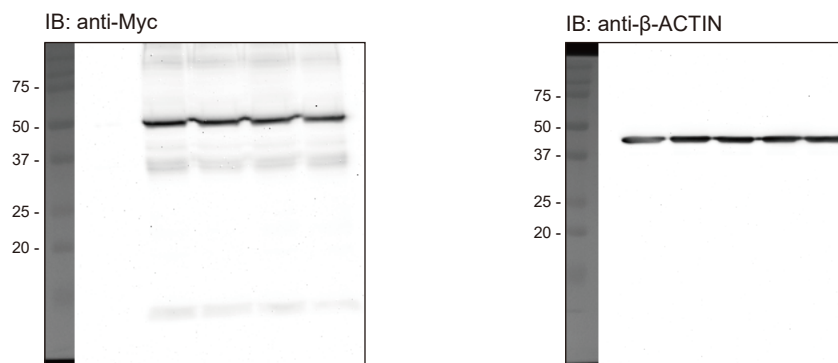

**Figure 1D**

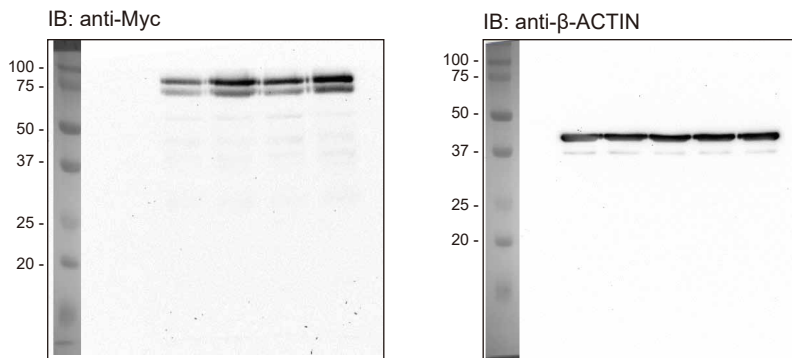

**Figure 1E**

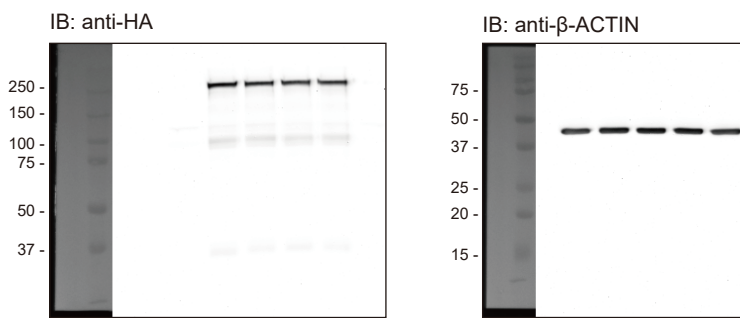

**Figure 4B**

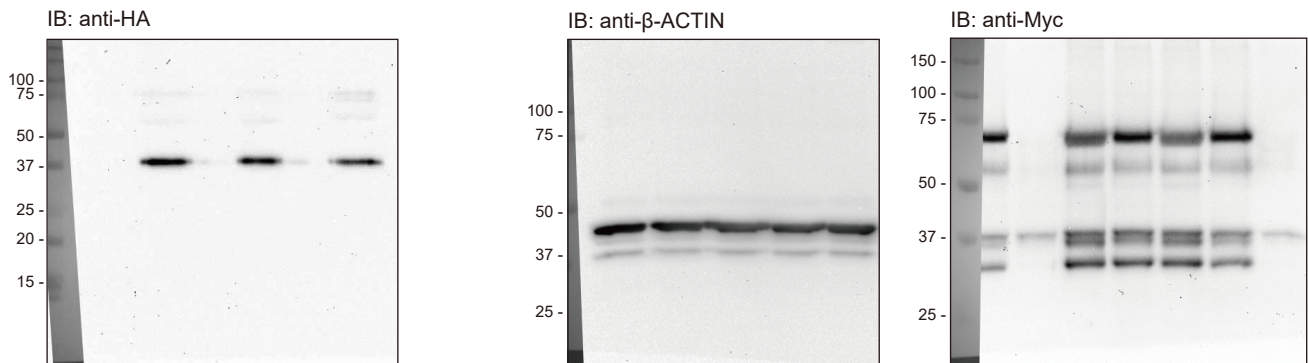

**Figure 4C**

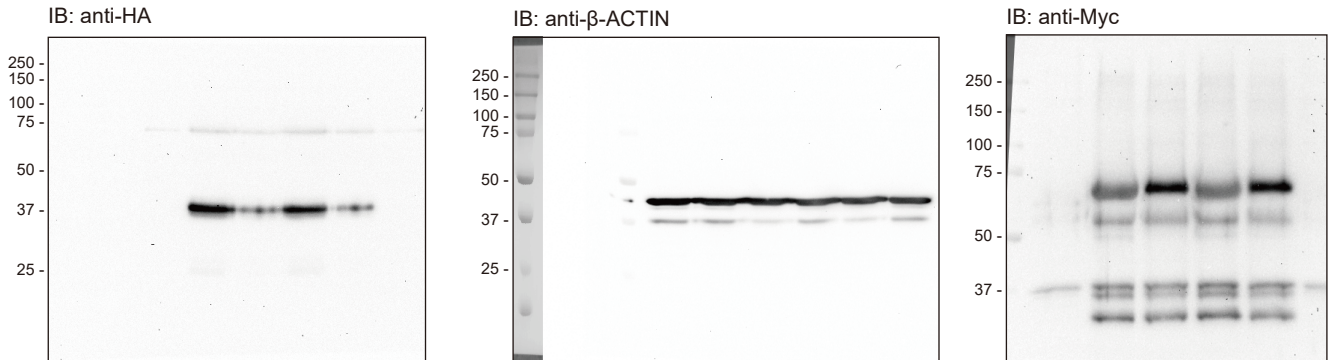

**Figure 4D**

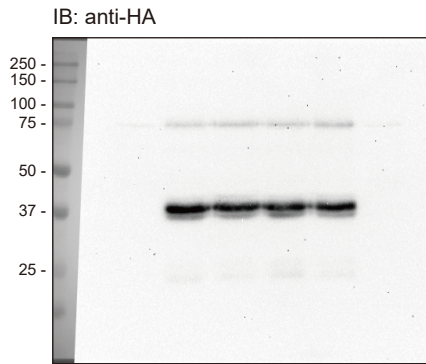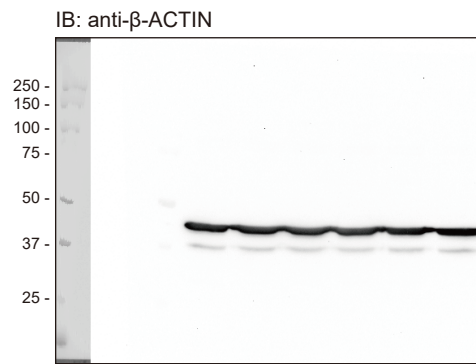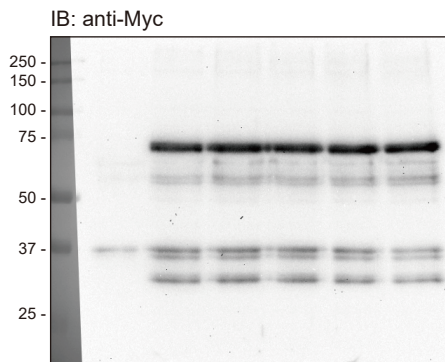

**Figure 4E**

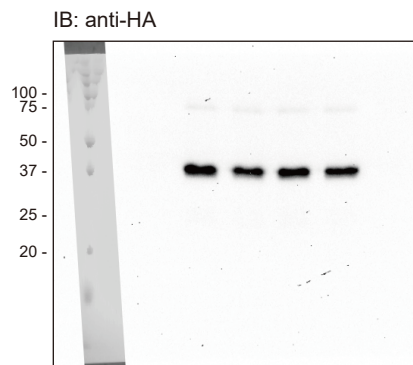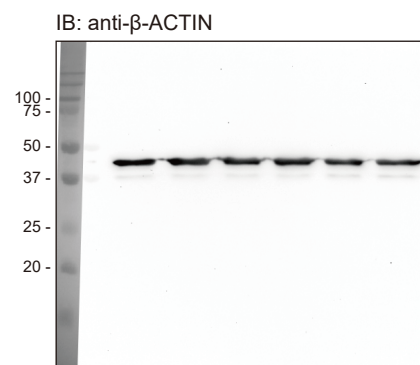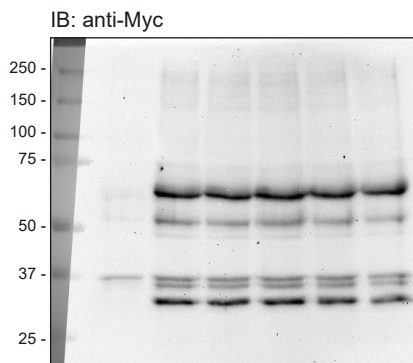

**Figure 5B**

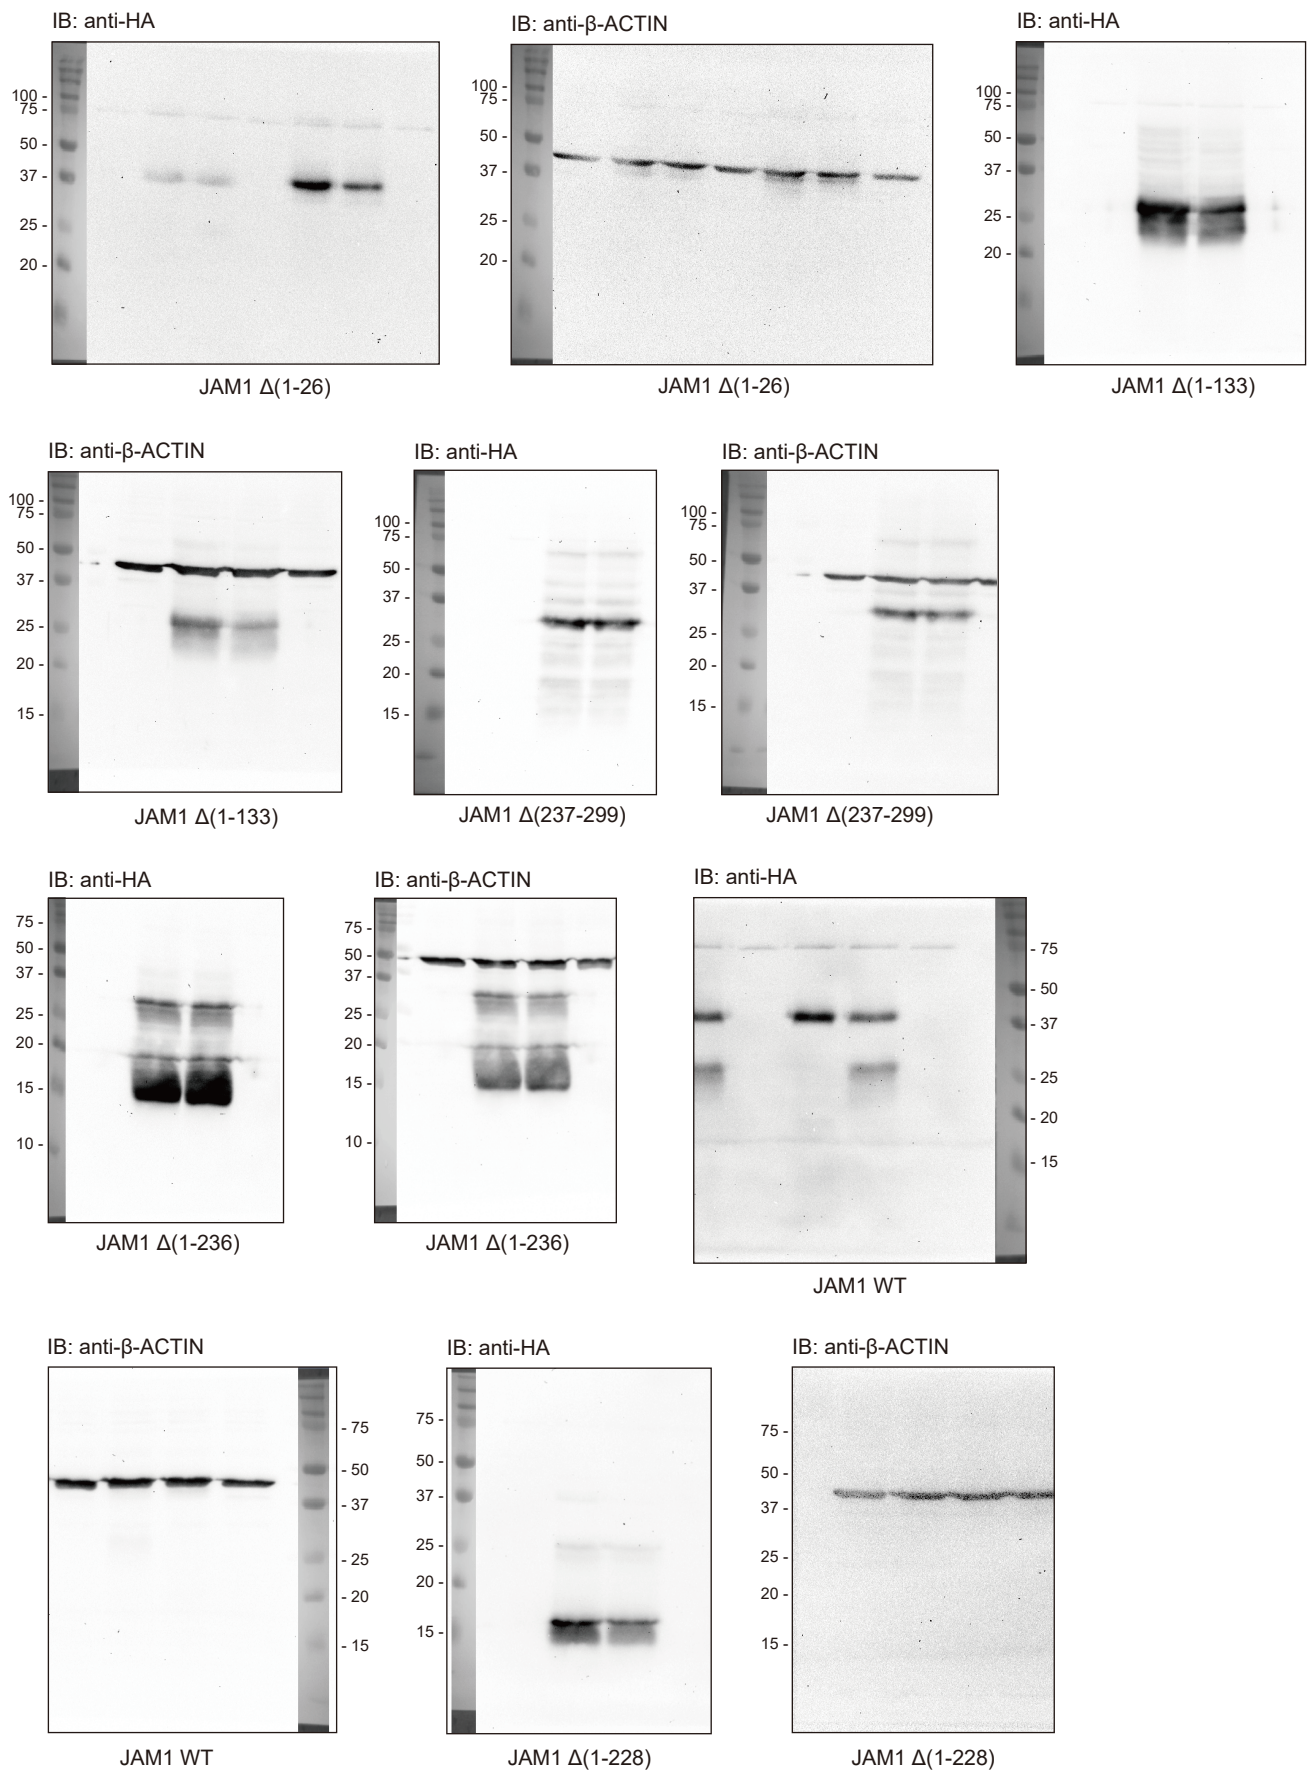

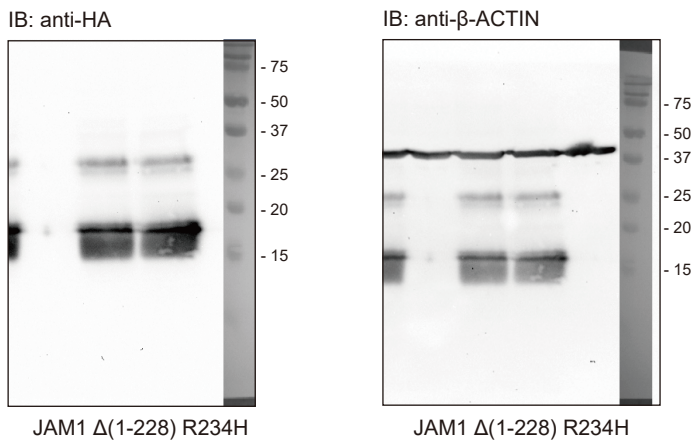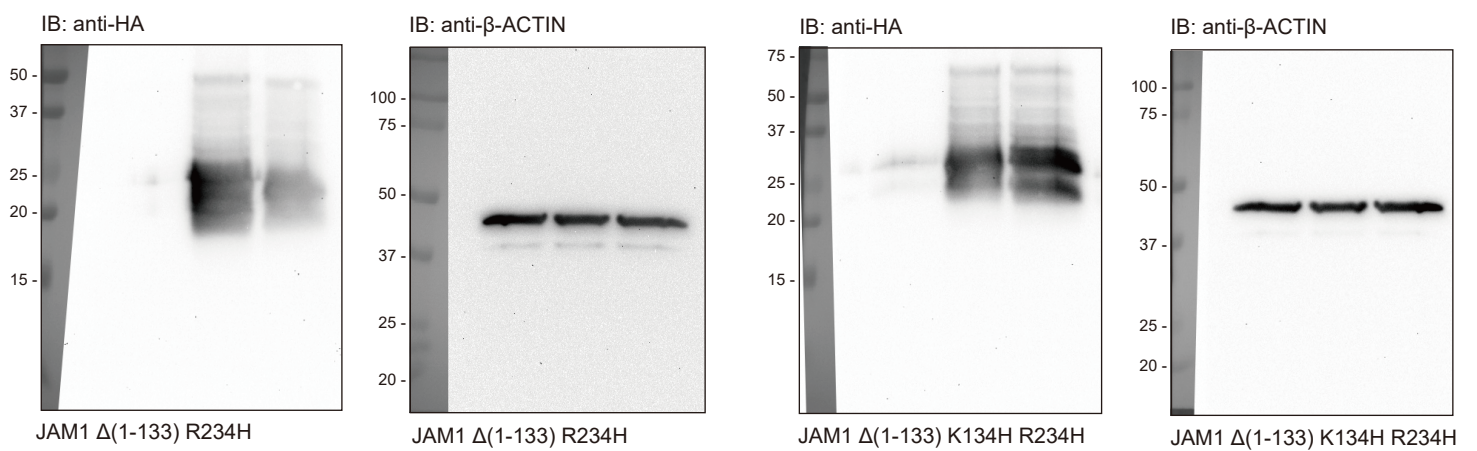

**Figure 6B**

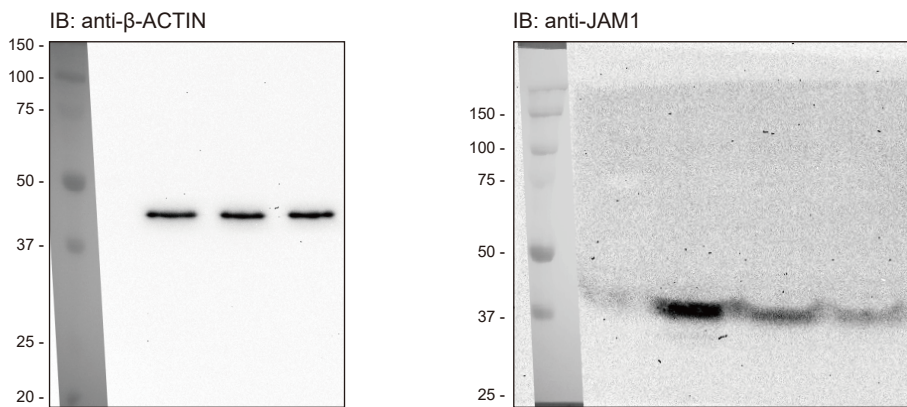

**Figure 8H**

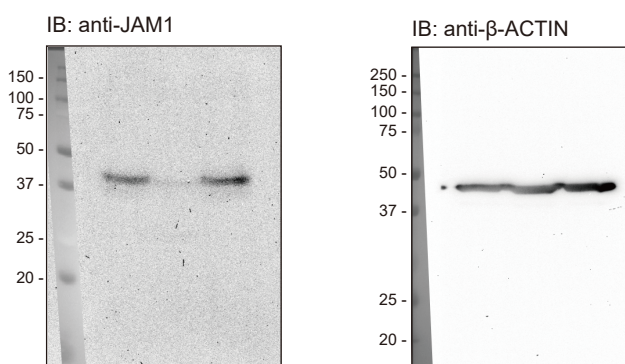

### S1 Fig

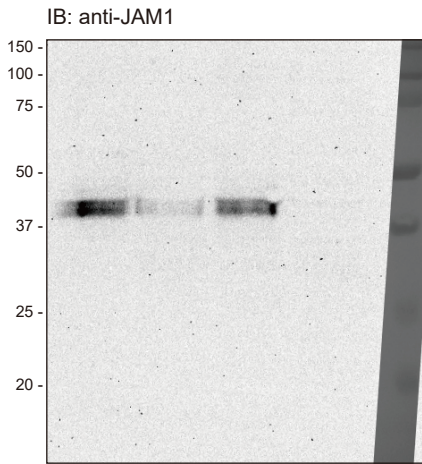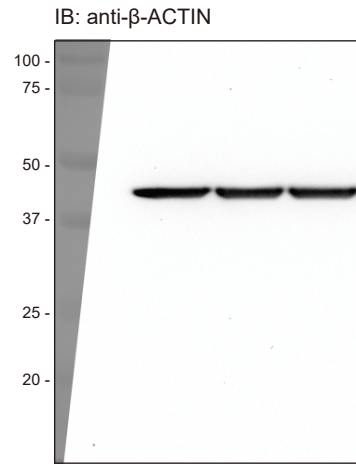

### S2 Fig

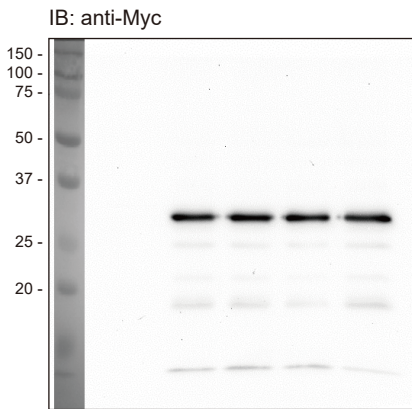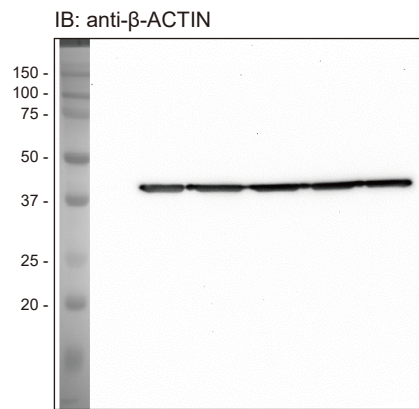

### S7 Fig

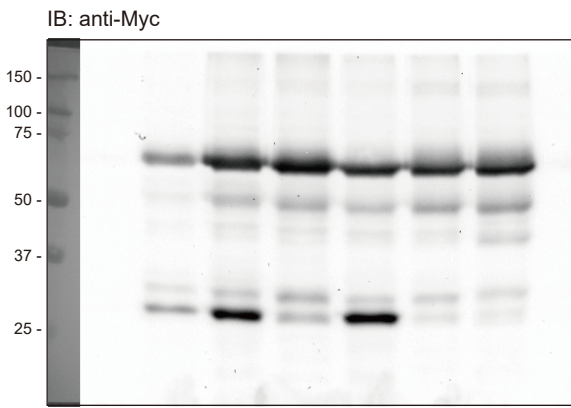

Myc-mCherry-tagged HA-inserted-JAM1

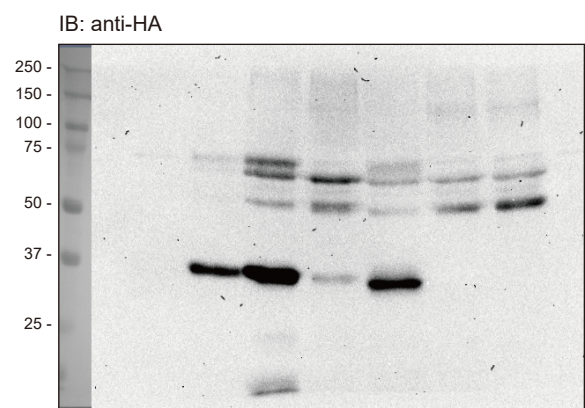

Myc-mCherry-tagged HA-inserted-JAM1

IB: anti- $\beta$ -ACTIN

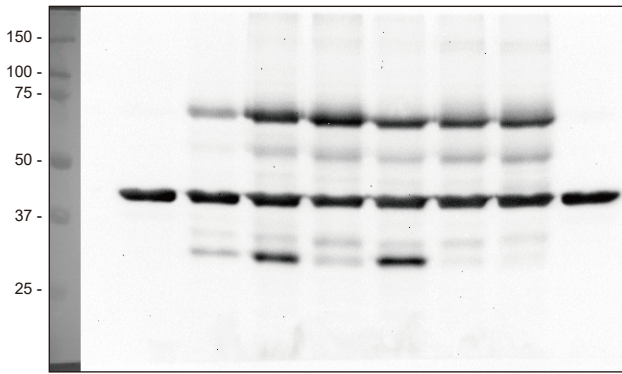

IB: anti-Myc

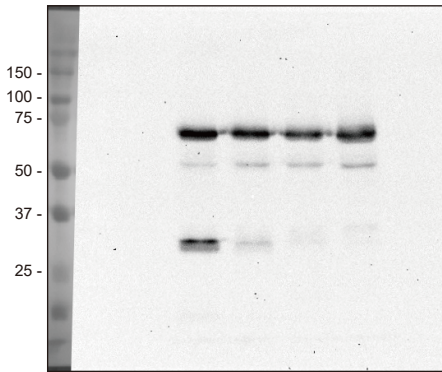

Myc-mCherry-tagged HA-inserted-JAM1

IB: anti-HA

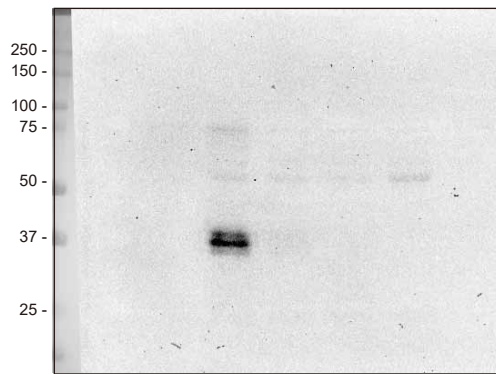

Myc-mCherry-tagged HA-inserted-JAM1

IB: anti- $\beta$ -ACTIN

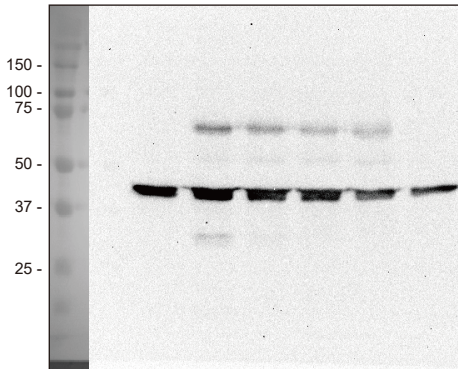

## S12 Fig

IB: anti-Myc

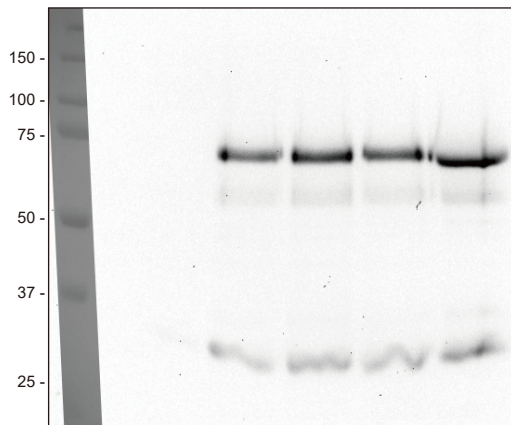

IB: anti-HA

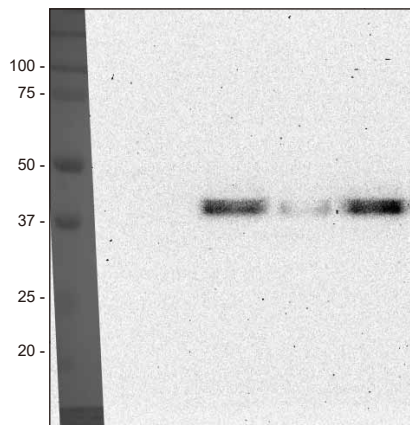

IB: anti- $\beta$ -ACTIN

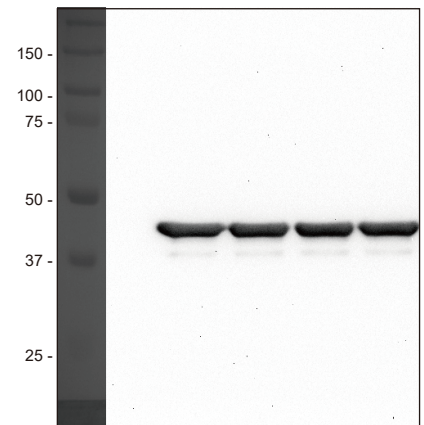

Supplement: ppat.1008124.s016.pdf [file ppat.1008124.s016.pdf]
